# Supplementary material for: Last Year of Life Study Cologne (LYOL-C): protocol for a cross-sectional mixed methods study to examine care trajectories and transitions in the last year of life until death
Source: PubMed Central journal article supplement — BMJ Open. 2018 Apr 17;8(4):e021211. doi: 10.1136/bmjopen-2017-021211 (PMC5905737; doi:10.1136/bmjopen-2017-021211), 2018-04-17
Supplement: bmjopen-2017-021211.draft_revisions.pdf [file bmjopen-2017-021211.draft_revisions.pdf]

# BMJ Open

BMJ Open is committed to open peer review. As part of this commitment we make the peer review history of every article we publish publicly available.

When an article is published we post the peer reviewers' comments and the authors' responses online. We also post the versions of the paper that were used during peer review. These are the versions that the peer review comments apply to.

The versions of the paper that follow are the versions that were submitted during the peer review process. They are not the versions of record or the final published versions. They should not be cited or distributed as the published version of this manuscript.

BMJ Open is an open access journal and the full, final, typeset and author-corrected version of record of the manuscript is available on our site with no access controls, subscription charges or pay-per-view fees (<http://bmjopen.bmj.com>).

If you have any questions on BMJ Open's open peer review process please email [info.bmjopen@bmj.com](mailto:info.bmjopen@bmj.com)

# BMJ Open

## **Last Year of Life Study Cologne (LYOL-C): a cross-sectional mixed methods study to examine care trajectories and transitions in the last year of life until death**

|                               |                                                                                                                                                                                                                                                                                                                                                                                                                                                                                                                                                                                                                                                                                                                                                                           |
|-------------------------------|---------------------------------------------------------------------------------------------------------------------------------------------------------------------------------------------------------------------------------------------------------------------------------------------------------------------------------------------------------------------------------------------------------------------------------------------------------------------------------------------------------------------------------------------------------------------------------------------------------------------------------------------------------------------------------------------------------------------------------------------------------------------------|
| Journal:                      | <i>BMJ Open</i>                                                                                                                                                                                                                                                                                                                                                                                                                                                                                                                                                                                                                                                                                                                                                           |
| Manuscript ID                 | bmjopen-2017-021211                                                                                                                                                                                                                                                                                                                                                                                                                                                                                                                                                                                                                                                                                                                                                       |
| Article Type:                 | Protocol                                                                                                                                                                                                                                                                                                                                                                                                                                                                                                                                                                                                                                                                                                                                                                  |
| Date Submitted by the Author: | 15-Dec-2017                                                                                                                                                                                                                                                                                                                                                                                                                                                                                                                                                                                                                                                                                                                                                               |
| Complete List of Authors:     | <p>Strupp, Julia; Medical Faculty of the University of Cologne, Department of Palliative Medicine</p> <p>Hanke, Gloria; Medical Faculty of the University of Cologne, Department of Palliative Medicine</p> <p>Schippel, Nicolas; University of Cologne, Faculty of Human Sciences</p> <p>Pfaff, Holger; University of Cologne, Cologne, Germany, Institute of Medical Sociology, Health Services Research, and Rehabilitation Science (IMVR)</p> <p>Karbach, U.; University of Cologne, Institute of Medical Sociology, Health Services Research, and Rehabilitation Science (IMVR)</p> <p>Rietz, Christian; University of Cologne, Faculty of Human Sciences</p> <p>Voltz, Raymond; Medical Faculty of the University of Cologne, Department of Palliative Medicine</p> |
| Keywords:                     | PALLIATIVE CARE, mixed methods, end-of-life care, health services research                                                                                                                                                                                                                                                                                                                                                                                                                                                                                                                                                                                                                                                                                                |
|                               |                                                                                                                                                                                                                                                                                                                                                                                                                                                                                                                                                                                                                                                                                                                                                                           |

SCHOLARONE™  
Manuscripts

1  
2  
3  
4  
5  
6  
7  
8  
9  
10  
11  
12  
13  
14  
15  
16  
17  
18  
19  
20  
21  
22  
23  
24  
25  
26  
27  
28  
29  
30  
31  
32  
33  
34  
35  
36  
37  
38  
39  
40  
41  
42  
43  
44  
45  
46  
47  
48  
49  
50  
51  
52  
53  
54  
55  
56  
57  
58  
59  
60

# Last Year of Life Study Cologne (LYOL-C): a cross-sectional mixed methods study to examine care trajectories and transitions in the last year of life until death

Strupp, Julia\*<sup>1</sup>, Hanke, Gloria\*<sup>1</sup>, Schippel, Nicolas<sup>2</sup>, Holger Pfaff<sup>3,4</sup>, Ute Karbach<sup>3,4</sup>, Rietz, Christian<sup>2</sup>, Voltz, Raymond<sup>1,3,5,6</sup>

on behalf of CoRe-Net

<sup>1</sup> University of Cologne, Medical Faculty, Department of Palliative Medicine, Cologne, Germany

<sup>2</sup> University of Cologne, Faculty of Human Sciences, Working Area Research Methodology Cologne, Germany

<sup>3</sup> University of Cologne, Center for Health Services Research Cologne, Germany (ZVFK)

<sup>4</sup> University of Cologne, Institute of Medical Sociology, Health Services Research, and Rehabilitation Science (IMVR), Germany

<sup>5</sup> University of Cologne, Center for Integrated Oncology Cologne / Bonn (CIO), Germany

<sup>6</sup> University of Cologne, Clinical Trials Center Cologne (ZKS), Germany

Corresponding author: Dr. Dr. Julia Strupp,

Postal address: Department of Palliative Medicine, Medical Faculty of the University of Cologne, Kerpener Str. 62, 50924 Köln

Email: [julia.strupp@uk-koeln.de](mailto:julia.strupp@uk-koeln.de)

Phone: [+49 221 478-87125](tel:+4922147887125)

Words: 2762

\*both authors contributed equally to this manuscript

## Abstract

**Introduction:** The last year of life constitutes a particularly vulnerable phase for patients, involving nearly all health and social care structures. Yet, little scientific evidence is available that provides insight into the trajectories including the number and types of care setting transitions, transitions into palliative care and the dying phase. Only few studies have focused on difficulties associated with having to move between health and social care settings in the last year of life, although patients face a significant risk of adverse events. The Last Year of Life Study Cologne (LYOL-C) aims to fill this gap.

**Methods and analysis:** LYOL-C is a mixed methods study composed of four steps. i) Claims data collected by the statutory health insurance funds of deceased persons will be analyzed with regard to patient care trajectories, health service transitions and costs in the last year of life. ii) Patient trajectories and transitions in health care will additionally be reconstructed by analyzing the retrospective accounts of bereaved relatives (n=400) using a culturally adapted version of the VOICES-SF (Views of Informal Carers – Evaluation of Services Short Form) questionnaire and the PACIC-SF (Patient Assessment of Care for Chronic Conditions Short Form) questionnaire adapted for relatives. iii) Qualitative interviews with bereaved relatives (n=40-60) will provide in-depth insight into reasons for transitions and effects on patients' quality of life. iv) Focus groups (n=3-5) with Health Care Professionals will be conducted to discuss challenges associated with transitions in the last year of life.

**Ethics and dissemination:** Ethical approval has been obtained from the Ethics Commission of the Faculty of Medicine of Cologne University (#17-188). Results will be submitted for publication in peer-reviewed journals and presented at national and international conferences.

**Trial registration:** The study is registered in the German Clinical Trials Register (DRKS00011925) and in the Health Services Research Database (VfD\_CoRe-Net\_17\_003806).

Words: 300

Keywords: end-of-life care, mixed methods, palliative care, health services research, dying phase

### Strengths and limitations of the study

- LYOL-C will be the first study in Germany to examine health and social care trajectories and transitions of patients in their last year of life until death (independent of patient age, underlying diagnoses or care settings) within an entire region that possesses optimal palliative and hospice care structures.
- Our survey sample will be recruited through multiple channels and with a comparatively large sample size (n=400) for palliative settings to ensure variety in care trajectories and places of death.
- The mixed methods design enables a multidimensional view to reconstruct the last year of life including the reports of bereaved relatives as well as health care professionals.
- Claims data can be validated externally with our survey data and vice versa while the interviews and focus groups enable a clarification of claims data and survey results with a multi-stakeholder perspective.
- The perspective of relatives can't be seen as a direct substitute for a self-assessment of patients, although moderate agreement between patient and proxy ratings develops over time [1].

## BACKGROUND

About 1% of the German population dies each year (e.g., in the year 2015, 925 200 deaths out of a total population of 81.6 million)[2]. For each patient who passes away, there are approx. three to four relatives who go through a subsequent bereavement period. This means that 5% of our population is affected by death each year, with the relative and absolute numbers increasing with changes in demography. In the year 2013, 46% of patients in Germany died in hospitals, with mortality rates increasing with age: 55% dying in hospitals were aged 65 and above. In North-Rhine-Westphalia, 49% died in hospitals, yet most people prefer to die at home, and hospitals have been perceived as giving only little support to patients' needs at the end of life. Furthermore, home care is cost-effective when shifting the care of the dying patients from hospital to home [3-5]. This is even more important as about one-third of the total health expenditure in a life span occurs during the last months of life [6 7] and there have been increases in both aggressive and non-aggressive care at the end of life with increasing multiple hospitalizations [8].

The last year of life therefore constitutes a particularly vulnerable phase in life for patients, involving nearly all health and social care structures. Yet, so far, only very little scientific evidence is available that provides insight into the trajectories including the number and types of care setting transitions. Only few studies have focused on difficulties associated with having to move between health and social care settings in the last year of life, such as the burden to caregivers and cost of hospital transfers [9 10], although patients face a significant risk of adverse events, for instance during the transition from hospital to home [11]. The Last Year of Life Study Cologne (LYOL-C) aims to fill this gap by being the first study in Germany to examine patient trajectories (independent of age, underlying diagnoses or care settings) and transitions between care settings and experiences in the last year of life including palliative care integration and the dying phase within a specific region (Cologne). Trajectories are defined as "(...) a course of illness over time plus the actions taken by patients, families and health professionals to manage or shape the course"[12]. Gill et al.[13] have found that the illness leading to death does not predict a patient's trajectory. Therefore it is necessary to identify typical trajectories in the last year of life and to thereby provide time frames and patterns of probable needs and support from health and social services for patients (and carers)[14]. A transition "(...) occurs between two locations or settings of care, for example moving from hospital to a care home. It may also represent a shift in the nature of care, such as the decision not to continue with curative treatments"[15]. Regarding LYOL-C, we therefore concentrate (a) on transitions within the disease trajectory, i.e. from a curative to a palliative approach as well as the dying phase and (b) transitions between health care structures, e.g., hospital to home, nursing home to hospital. It is important to study the

1  
2  
3 patients' and professionals' point of view on (i) which transitions take place, (ii) what are the  
4 reasons and determinants for these transitions (e.g., DRG-related factors), (iii) what are the  
5 effects on patient quality of life, (iv) whether how and when a palliative care approach was  
6 introduced and finally, (v) where and how patients die. Cologne, with its one million  
7 inhabitants, is representative of the German urban setting and already possesses optimal  
8 palliative and hospice care structures [16]. The LYOL-C study is the first step in developing a  
9 stable regional End of Life Care Network, similar to the National End of Life Network in the  
10 UK [17], which will bring together all stakeholders caring for people at the end of life. This  
11 network will also serve as the basis for immediate and future patient-centered and value-  
12 based changes derived from the initial descriptive and hypothesis-generating data obtained  
13 within the Cologne Research and Development Network (CoRe-Net). LYOL-C, being one of  
14 the CoRe-Net subprojects, aims to improve the management of patients in their last year of  
15 life including the dying phase.

16 Patient preferences and values must be integrated more into the development of health care  
17 structures [18]. This is especially relevant for and apparent in the last year of life, which is a  
18 major contributor to overall health care costs [6]. Palliative Care encompasses central  
19 elements associated with patient-centered and value-based care, including physical comfort  
20 and emotional support, dignity and respect during the dying process, shared decision  
21 making, identifying and meeting the patient's needs and values, and coordinating care [19  
22 20]. Internationally it has been reported that despite the growing use of palliative and hospice  
23 care structures, there has been an increase in the number of transitions in the last year of life  
24 [15 21]. The primary contributors to this are structural factors (e.g., financial, legal) and a lack  
25 of emphasis on increasing value for patients and relatives [22]. The Patient-Centered  
26 Outcomes Research Institute has found that poorly executed transitions between health care  
27 settings can harm patients and lead to additional hospital visits [23] which can be  
28 burdensome and decrease quality of life [21 24]. In the US, hospital readmission follows 12-  
29 25% of hospital discharges in the last year of life, with almost 50% of readmissions going  
30 through an emergency room [25]. The fact that caregivers are often emotionally and  
31 physically burdened with providing home care is one factor leading to admission into  
32 inpatient care settings, despite the fact that relatives' and patients' preferences for home  
33 care have not changed. A recent study has found that a greater understanding of family  
34 caregivers' preferences is needed to identify how best to support families at the end of life  
35 and to ensure more patients are cared for in a value-based way [26].

36 For Germany, scientific evidence on the benefits of Palliative Care has emerged in recent  
37 years, currently mainly on specific aspects of care structures (e.g., discharge after stay in a  
38 palliative care unit) [27-29] or restricted to clinical questions, e.g., pain or breathlessness [30-  
39 32]. A general health services research approach incorporating all regional care structures is

1  
2  
3 still missing. The city of Cologne, which is home to Germany's first palliative care unit  
4 founded at the University Hospital of Cologne in 1983, currently offers an area-wide palliative  
5 and hospice care setting including all care structures currently offered by the German  
6 system. Cologne even has a three-level palliative care structure – general (general  
7 practitioners [GPs], nursing), intermediate (qualified palliative care physicians and palliative  
8 care nursing [QPA]) and specialized palliative outpatient care (SAPV) – which is unique to  
9 the North-Rhine area. The city, therefore, provides the optimal urban setting for studying  
10 future health service developments in end-of-life care in Germany.  
11  
12  
13  
14  
15

16 LYOL-C therefore aims to

- 17 I. examine care trajectories and transitions in the last year of life until death in Cologne,
- 18 II. improve the management of patients in their last year of life including the dying phase  
19 by consented immediate action in a patient-centered and value-based way,
- 20  
21 III. derive further care innovations based on initial descriptive and hypothesis-generating  
22 data that could be evaluated in future studies.  
23  
24  
25

## 26 **METHODS AND ANALYSIS**

27  
28  
29 LYOL-C is a mixed methods study and consists of four phases:

### 30 **Phase I: Claims Data Analysis on the patient epidemiology of the last year of life**

31  
32 Several statutory health insurance funds (SHI) will provide anonymised claims data, covering  
33 together ~55% of the Cologne population. With regard to Cologne, about 800.000 people are  
34 insured with the SHI. Taking into account that 1% of them die each year (~8.000) [33], we  
35 are able to analyze patient trajectories of all deceased insureds of the participating SHI  
36 funds. Counting backward from date of death, the last year of life can be assessed for those  
37 continuously insured until death using data from the respective SHI fund. In a first step,  
38 deceased patients are characterized according to age, sex, medication (e.g., polypharmacy),  
39 morbidity (e.g., Charlson and Elixhauser comorbidity measures assessed by ICD 10 codes),  
40 utilization of long term nursing care (level and place of care) and other health problems  
41 highly prevalent in patients at the end of life (e.g., oral health issues). In addition, direct  
42 medical costs will be estimated for the last year of life according to sectors of care. Master  
43 data (e.g., insurance time, pseudonymized unique patient identifier) will be used for defining  
44 the study population, while master data (sex, age, nursing care) and information from all  
45 sectors of care will be used for describing the population and analyzing influencing factors on  
46 the outcome variables (e.g. number of transitions, place of death) using multiple regression  
47 analysis. Trajectories between sectors of care can be analyzed with the help of the  
48 pseudonymized patient identifiers. Emergency visits and hospital referrals according to  
49  
50  
51  
52  
53  
54  
55  
56  
57  
58  
59

1  
2  
3 doctor's specialty will be assessed. Analysis will be performed for all patients who died  
4 (excluding accidents and homicides). Analysis will provide a status quo of main care  
5 trajectories to be analyzed in the following steps.

6  
7 **Inclusion criteria:** Deceased person who lived in Cologne and died aged 18 years or older.  
8  
9

## 10 **Phase II: Quantitative survey with bereaved informal caregivers to analyze patient** 11 **trajectories in the last year of life**

12  
13 Patient trajectories and transitions in health care will be reconstructed by analyzing the  
14 retrospective accounts of bereaved relatives (n=400). A questionnaire will be used, covering  
15 e.g., the number and types of transitions between care settings, use of palliative care  
16 services and (best) timing of admission to palliative care services. Data will also be collected  
17 using the validated Views of Informal Carers – Evaluation of Services Short Form (VOICES-  
18 SF) questionnaire. VOICES is a postal questionnaire about experiences of end of life care in  
19 the last months of life, focusing on quality of care and services received. Using the post-  
20 bereavement method it gathers information from bereaved relatives, friends or carers acting  
21 as proxies [34]. Within our study, we will adapt the questions of VOICES-SF to the German  
22 health care system and translate them into German. Procedures for translation and  
23 assessment are based on the team translation approach described by Harkness (“TRAPD”)  
24 [35] which is also applied in cross-national social surveys (e.g. European Social Survey [36],  
25 Programme for the International Assessment of Adult Competencies [37]). To analyze  
26 patient-centeredness, the Patient Assessment of Care for Chronic Conditions Short Form  
27 (PACIC-SF) [38-40] will be applied. The instrument measures the extent to which patients  
28 receive care that is patient-centered, proactive, planned and includes collaborative goal  
29 setting, problem-solving and follow-up support. It is a validated patient self-report instrument  
30 and will be adapted for usage with bereaved relatives. Participants will be recruited mainly  
31 via our field access partners. Recruitment will also be done via newspaper advertisements,  
32 GPs, local GP networks (snowballing technique) and local bereavement groups run by  
33 palliative hospice structures. We expect recruitment to go smoothly, as recruitment also went  
34 rapidly in previous research projects, such as on living wills and multiple sclerosis [41 42].

35  
36 The survey design allows comparisons to be made between the quality of care given to  
37 people dying at different ages (for example less than 65 years, 65-79 years or 80 years or  
38 more) and different causes of death (cardiovascular, cancer or other) and for people  
39 receiving care in different settings during the last months of life (for example home, hospital,  
40 care home and/or hospice). Analysis is undertaken in various statistical packages using  
41 weights and the sampling stratification. The VOICES survey e.g. calculates a weight for each  
42 response to the survey, to account for biases within the sample design, adjust for non-  
43 response bias and calibrate weights to the population of the sampling frame. These weights  
44  
45  
46  
47  
48  
49  
50  
51  
52  
53  
54  
55  
56  
57  
58  
59  
60

are used to calculate weighted percentages. Data will be analyzed using SPSS Statistics 24.

**Inclusion Criteria:** Relatives, friends, carers and volunteers can be included if i) they are 18 years or older, ii) they have cared for a deceased person in his/her last year of life, iii) the deceased person was 18 years or older, iv) his/her death has occurred in the last 12 months.

**Exclusion Criteria:** Accidental death and killing.

### **Phase III: In-depth interviews with bereaved informal caregivers to gain insight into patient trajectories**

Qualitative interviews (n=40 to 60, by means of purposeful sampling to secure maximum heterogeneity) with bereaved relatives will provide in-depth insight into the reasons for transitions and the effects on the quality of life of the patients, including in the dying phase. Relatives will be recruited based on the type of care trajectory, the five most frequent types of trajectories (as reconstructed from the claims data analysis and questionnaire survey), site of death, underlying diagnoses, living situation, age and sex of the deceased. Interviews will follow a topic guide to ensure consistency across interviews. Interviews will be conducted during the first 12 months after death to ensure that relatives' memories are sufficiently fresh for them to provide details about their experiences. They can decide by themselves about the best timing for them to participate in the interview and feel able to speak about their experiences without becoming too upset. All interviews will be recorded, transcribed verbatim and anonymized.

Krueger & Casey (2000) advocate the use of a computer-based approach for cutting, pasting, sorting, arranging and rearranging data through comparing and contrasting the relevant information. For this purpose we will use MAXQDA, professional software for qualitative data analysis, as already mentioned for analyzing patient trajectories via qualitative interviews. Data will be analyzed according to Fisseni [43] and applying qualitative content analysis according to Flick [44] which has already been successfully performed in some of our own studies [45 46].

**Inclusion criteria:** see phase II

**Exclusion criteria:** see phase II

### **Phase IV: Focus Groups with Health Care Professionals (HCPs) to analyze views on transitions**

Focus groups (n=3-5) with HCPs will be conducted to discuss challenges associated with transitions in the last year of life and identify key issues and possibilities for improvements in the organization. Following analysis of the data extracted in phases I to III, focus groups will be conducted with key health and social care providers involved in the care of people in the last year of life within hospital and outpatient settings, nursing homes, hospices, etc. The aim is to explore current practice in health and social care management and the way that

transitions to a palliative care approach and transitions between structures are managed in different settings and how the care organizations are able to assess patient needs, preferences and health literacy. This phase will be conducted with support from our field access partners. Purposive sampling will be used to select a diverse range of HCPs and achieve the maximum possible variation of experience and opinion. Data will be analyzed according to Fisseni [43] and applying qualitative content analysis according to Flick [44].

**Inclusion criteria:** HCPs involved in the care of people in the last year of life in Cologne.

The study period will be from February 2017 to January 2020.

### **ETHICS AND DISSEMINATION**

People who are approaching the end of life are particularly vulnerable. We will therefore analyze the views of bereaved relatives as well as health professionals and analyze claims data to describe patients' trajectories. The Oxford Textbook of Palliative Medicine [47] sets out five ethical aspects that should be considered when undertaking palliative care research: the study's potential benefits to future patients, the study's potential benefits to subjects, the study's risk to subjects, subjects' decision-making capacity, and the voluntariness of subjects' choices about research participation. All these aspects will be addressed within our project and all respondents will only participate with an informed consent. Ethical approval for this study was obtained from the Ethics Commission of the Faculty of Medicine of Cologne University (#17-188).

Restructuring complex care for vulnerable patients at the end of life is highly needed in Germany because these patients often are lost in transition between multi-professional and multi-institutional care providers. This generates unnecessary costs, ill-health and thus low value for patient and their relatives and caregivers. The results of our study will be disseminated within the region of Cologne via the Cologne lab conferences and CoRe-Net public relations. To further implement regional changes, CoRe-Net will be immediately "available" as a "Cologne lab" with collaboration partners, a large database and standardized pathways derived from the projects. Possible changes that can be directly implemented after the first funding phase (years 1-3) of LYOL-C are, e.g., "round tables" for health professionals treating patients in their last year of life in order to discuss sign-posts for transitions.

Results of all four phases will be submitted for publication in peer-reviewed journals and presented at national and international conferences.

### **List of Abbreviations**

CoRe-Net – Cologne Research and Development Network

1  
2  
3 GP – General Practitioner

4 HCPs – Health Care Professionals

5 LYOL-C – Last Year of Life Study Cologne

6 PACIC-SF - Patient Assessment of Care for Chronic Conditions Short Form

7 QPA - qualified palliative care physicians

8 SAPV - specialized palliative outpatient care

9 SHI – Statutory Health Insurance Funds

10 VOICES-SF - Views of Informal Carers – Evaluation of Services Short Form

## 11 12 13 14 15 16 **Declarations**

### 17 • Authors' contributions

18 JS is Principal Investigator and responsible for the study design and project management

19 GH is responsible for the operative management of LYOL-C, the recruitment, data collection,  
20 data analysis, dissemination

21 NS is responsible for the recruitment, data collection, data analysis, dissemination

22 HP and UK are principal investigators of CoRe-net and responsible for methodological  
23 consulting

24 CR is Principal Investigator and responsible for the study design and project management

25 RV is Principal Investigator and responsible for the study design and project management

26 All authors read and approved the final manuscript.

### 27 • Funding

28 This work was supported by the German Federal Ministry of Education and Research  
29 (BMBF), grant number #01GY1606

### 30 • Ethics approval and consent to participate

31 Ethical approval for this study was obtained from the Ethics Commission of the Faculty of  
32 Medicine of Cologne University (#17-188).

### 33 • Consent of publication

34 Not applicable.

### 35 • Availability of data and material

36 The datasets generated and/or analyzed during the current study are available from the  
37 corresponding author on reasonable request.

### 38 • Competing interests

39 The authors declare that they have no competing interests.

### 40 • Acknowledgements

41 The authors would like to thank the BMBF for funding this study (#01GY1606) as well as our  
42 field access partner for their support. We would also like to acknowledge the support from  
43 our CoRe-Net Co-applicants: Prof. Dr. Christian Albus, Department of Psychosomatics and  
44

1  
2  
3 Psychotherapy, Faculty of Medicine (FM), University Hospital Cologne (UHC), Jun-Prof. Dr.  
4 Lena Ansmann, Institute of Medical Sociology, Health Services Research and Rehabilitation  
5 Science (IMVR), Faculty of Human Sciences (FHS), University of Cologne (UoC), Prof. Dr.  
6 Frank Jessen, Department of Psychiatry and Psychotherapy, FM, UHC, Dr. Ute Karbach,  
7 IMVR, Center for Health Services Research Cologne (ZVFK), FM, FHS, UoC, Prof. Dr.  
8 Ludwig Kuntz, Department of Business Administration and Health Care Management,  
9 Faculty of Management, Economics and Social Sciences (FMESS), UoC, Dr. Ingrid  
10 Schubert, PMV Health Care Research Group, FM, UoC, Prof. Dr. Frank Schulz-Nieswandt,  
11 Institute for Sociology and Social Psychology, FMESS, UoC, Prof. Dr. Stephanie Stock,  
12 Institute for Health Economics and Clinical Epidemiology, FM, UHC.  
13  
14  
15  
16  
17  
18  
19  
20  
21  
22  
23  
24  
25  
26  
27  
28  
29  
30  
31  
32  
33  
34  
35  
36  
37  
38  
39  
40  
41  
42  
43  
44  
45  
46  
47  
48  
49  
50  
51  
52  
53  
54  
55  
56  
57  
58  
59  
60

## References

1. Jones JM, McPherson CJ, Zimmermann C, Rodin G, Le LW, Cohen SR. Assessing agreement between terminally ill cancer patients' reports of their quality of life and family caregiver and palliative care physician proxy ratings. *J Pain Symptom Manage* 2011;**42**(3):354-65 doi: 10.1016/j.jpainsymman.2010.11.018[published Online First: Epub Date]].
2. Statistisches Bundesamt. *Gesundheit: Todesursachen in Deutschland*. Wiesbaden: Statistisches Bundesamt, 2015.
3. Pham B, Krahn M. End-of-Life Care Interventions: An Economic Analysis. *Ont Health Technol Assess Ser* 2014;**14**(18):1-70
4. Gomes B, Calanzani N, Higginson IJ. Benefits and costs of home palliative care compared with usual care for patients with advanced illness and their family caregivers. *JAMA* 2014;**311**(10):1060-1 doi: 10.1001/jama.2014.553[published Online First: Epub Date]].
5. Smith S, Brick A, O'Hara S, Normand C. Evidence on the cost and cost-effectiveness of palliative care: a literature review. *Palliat Med* 2014;**28**(2):130-50 doi: 10.1177/0269216313493466[published Online First: Epub Date]].
6. Hogan C, Lunney J, Gabel J, Lynn J. Medicare Beneficiaries' Costs Of Care In The Last Year Of Life. *Health Affairs* 2001;**20**:188–95 doi: doi: 10.1377/hlthaff.20.4.188[published Online First: Epub Date]].
7. Lubitz JD, Riley GF. Trends in Medicare Payments in the Last Year of Life. *New England Journal of Medicine* 1993;**328**(15):1092-96 doi: 10.1056/nejm199304153281506[published Online First: Epub Date]].
8. Riley GF, Lubitz JD. Long-Term Trends in Medicare Payments in the Last Year of Life. *Health Services Research* 2010;**45**(2):565-76 doi: 10.1111/j.1475-6773.2010.01082.x[published Online First: Epub Date]].
9. Halasyamani L, Kripalani S, Coleman E, et al. Transition of Care for Hospitalized Elderly. *Hosp. Med* 2006;**6**:354-60 doi: doi:10.1002/jhm.129[published Online First: Epub Date]].
10. Ma E, Coleman EA, Fish R, Lin M, Kramer AM. Quantifying Posthospital Care Transitions in Older Patients. *Journal of the American Medical Directors Association* 2004;**5**(2):71-74 doi: [http://dx.doi.org/10.1016/S1525-8610\(04\)70058-4](http://dx.doi.org/10.1016/S1525-8610(04)70058-4)[published Online First: Epub Date]].
11. Forster AJ, Murff HJ, Peterson JF, Gandhi TK, Bates DW. The incidence and severity of adverse events affecting patients after discharge from the hospital. *Annals of Internal Medicine* 2003;**138**(3):161-67 doi: 10.7326/0003-4819-138-3-200302040-00007[published Online First: Epub Date]].
12. Corbin JM. The Corbin and Strauss Chronic Illness Trajectory model: an update. *Scholarly Inquiry for Nursing Practice* 1998;**12**(1):33-41
13. Gill TM, Gahbauer EA, Han L, Allore HG. Trajectories of Disability in the Last Year of Life. *The New England journal of medicine* 2010;**362**(13):1173-80 doi: 10.1056/NEJMoa0909087[published Online First: Epub Date]].
14. Murray SA, Kendall M, Boyd K, Sheikh A. Illness trajectories and palliative care. *BMJ : British Medical Journal* 2005;**330**(7498):1007-11
15. Hanratty B, Lowson E, Grande G, et al. Transitions at the end of life for older adults – patient, carer and professional perspectives: a mixed-methods study. *Health Services and Delivery Research* 2014;**2**:1-102
16. Erdogan-Griese B. Palliativmedizin im Rheinland: Ein starkes Netz für das Leben. *Rheinisches Ärzteblatt* 2012:12-13
17. National End of Life Care Intelligence Network. *What do we know now that we didn't know a year ago? New intelligence on end of life care in England*, 2012.
18. Porter ME, Pabo EA, Lee TH. Redesigning Primary Care: A Strategic Vision To Improve Value By Organizing Around Patients' Needs. *Health Affairs* 2013;**32**(3):516-25 doi: 10.1377/hlthaff.2012.0961[published Online First: Epub Date]].
19. Singer PA, Martin DK, Kelner M. Quality end-of-life care: Patients' perspectives. *JAMA* 1999;**281**(2):163-68 doi: 10.1001/jama.281.2.163[published Online First: Epub Date]].
20. Teno JM, Casey VA, Welch LC, Edgman-Levitan S. Patient-Focused, Family-Centered End-of-Life Medical Care. *Journal of Pain and Symptom Management* 2001;**22**(3):738-51 doi: [http://dx.doi.org/10.1016/S0885-3924\(01\)00335-9](http://dx.doi.org/10.1016/S0885-3924(01)00335-9)[published Online First: Epub Date]].
21. Gozalo P, Teno JM, Mitchell SL, et al. End-of-Life Transitions among Nursing Home Residents with Cognitive Issues. *New England Journal of Medicine* 2011;**365**(13):1212-21 doi: 10.1056/NEJMsa1100347[published Online First: Epub Date]].
22. Weber M, Claus M, Zepf KI, Fischbeck S, Escobar Pinzon LC. Dying in Germany—Unfulfilled Needs of Relatives in Different Care Settings. *Journal of Pain and Symptom Management*

- 2012;**44**(4):542-51 doi: <http://dx.doi.org/10.1016/j.jpainsymman.2011.10.024>[published Online First: Epub Date]].
23. Patient-Centered Outcomes Research Institute (pcori). In care transitions, a chance to make or break patients' recovery. Secondary In care transitions, a chance to make or break patients' recovery 2015. <http://www.pcori.org/research-in-action/care-transitions-chance-make-or-break-patients-recovery>.
24. Smeenk FWJM, de Witte LP, van Haastregt JCM, Schipper RM, Biezemans HPH, Crebolder HFJM. Transmural care. Patient Education and Counseling 1998;**35**(3):189-99 doi: [http://dx.doi.org/10.1016/S0738-3991\(98\)00062-7](http://dx.doi.org/10.1016/S0738-3991(98)00062-7)[published Online First: Epub Date]].
25. Coleman EA, Min S-j, Chomiak A, Kramer AM. Posthospital Care Transitions: Patterns, Complications, and Risk Identification. Health Services Research 2004;**39**(5):1449-66 doi: 10.1111/j.1475-6773.2004.00298.x[published Online First: Epub Date]].
26. Woodman C, Baillie J, Sivell S. The preferences and perspectives of family caregivers towards place of care for their relatives at the end-of-life. A systematic review and thematic synthesis of the qualitative evidence. BMJ Supportive & Palliative Care 2016;**6**(4):418-29 doi: 10.1136/bmjspcare-2014-000794[published Online First: Epub Date]].
27. Jors K, Adami S, Xander C, et al. Dying in cancer centers: Do the circumstances allow for a dignified death? Cancer 2014;**120**(20):3254-60 doi: 10.1002/cncr.28702[published Online First: Epub Date]].
28. Kötzsch F, Stiel S, Heckel M, Ostgathe C, Klein C. Care trajectories and survival after discharge from specialized inpatient palliative care—results from an observational follow-up study. Supportive Care in Cancer 2015;**23**(3):627-34 doi: 10.1007/s00520-014-2393-y[published Online First: Epub Date]].
29. Pinzón LCE, Claus M, Zepf KI, Fischbeck S, Weber M. Symptom Prevalence in the Last days of Life in Germany. American Journal of Hospice and Palliative Mediciner 2011;**29**(6):431-37 doi: 10.1177/1049909111425228[published Online First: Epub Date]].
30. Simon ST, Weingärtner V, Higginson IJ, Voltz R, Bausewein C. Definition, Categorization, and Terminology of Episodic Breathlessness: Consensus by an International Delphi Survey. Journal of Pain and Symptom Management 2014;**47**(5):828-38 doi: <http://dx.doi.org/10.1016/j.jpainsymman.2013.06.013>[published Online First: Epub Date]].
31. Simon ST, Weingärtner V, Voltz R, Higginson IJ, Bausewein C. Episodic Breathlessness: A Clinically Relevant and Rising Issue. Annals of the American Thoracic Society 2014;**11**(2):274-74 doi: 10.1513/AnnalsATS.201311-407LE[published Online First: Epub Date]].
32. Weingaertner V, Scheve C, Gerdes V, et al. Breathlessness, Functional Status, Distress, and Palliative Care Needs Over Time in Patients With Advanced Chronic Obstructive Pulmonary Disease or Lung Cancer: A Cohort Study. Journal of Pain and Symptom Management 2014;**48**(4):569-81.e1 doi: <http://dx.doi.org/10.1016/j.jpainsymman.2013.11.011>[published Online First: Epub Date]].
33. Statistisches Bundesamt. *Bevölkerung und Erwerbstätigkeit. Zusammenfassende Übersichten Eheschließungen, Geborene und Gestorbene: 1946 - 2015*. Wiesbaden: Statistisches Bundesamt, 2016.
34. Hunt K, Addington-Hall JM. A Toolkit for the Design and Planning of Locally-led VOICES Surveys. Secondary A Toolkit for the Design and Planning of Locally-led VOICES Surveys 2011.
35. Harkness J. Questionnaire Translation. In: Harkness J, van de Vijver FJR, Mohler PPh, eds. Cross-Cultural Survey Methods. New York: Wiley, 2003:35-56.
36. European Social Survey. ESS Round 8 Translation Guidelines. Secondary ESS Round 8 Translation Guidelines 2016. [http://www.europeansocialsurvey.org/docs/round8/methods/ESS8\\_translation\\_guidelines.pdf](http://www.europeansocialsurvey.org/docs/round8/methods/ESS8_translation_guidelines.pdf).
37. Ferrari A, Wayrynen L, Behr D, Zabal A. Translation, Adaptation, and Verification of Test and Survey Materials. In: (Ed.) O, ed. Technical Report of the Survey of Adult Skills (PIAAC) Paris: Chapter 4, pp. 1-28, 2013.
38. Gensichen J, Serras A, Paulitsch MA, et al. The Patient Assessment of Chronic Illness Care Questionnaire: Evaluation in Patients with Mental Disorders in Primary Care. Community Mental Health Journal 2011;**47**(4):447-53 doi: 10.1007/s10597-010-9340-2[published Online First: Epub Date]].
39. Goetz K, Freund T, Gensichen J, Miksch A, Szecsenyi J, Steinhäuser J. Adaptation and Psychometric Properties of the PACIC Short Form. Am J Manag Care 2012;**18**(2):e55-e60
40. Rosemann T, Laux G, Drossemeyer S, Gensichen J, Szecsenyi J. Evaluation of a culturally adapted German version of the Patient Assessment of Chronic Illness Care (PACIC 5A) questionnaire in a sample of osteoarthritis patients. Journal of Evaluation in Clinical Practice

- 1  
2  
3 2007;**13**(5):806-13 doi: 10.1111/j.1365-2753.2007.00786.x[published Online First: Epub  
4 Date]].
- 5 41. Golla H, Galushko M, Pfaff H, Voltz R. Multiple sclerosis and palliative care - perceptions of  
6 severely affected multiple sclerosis patients and their health professionals: a qualitative study.  
7 BMC Palliative Care 2014;**13**:11-11 doi: 10.1186/1472-684X-13-11[published Online First:  
8 Epub Date]].
- 9 42. Strupp J, Golla H, Galushko M, et al. Self-rating makes the difference: Identifying palliative care  
10 needs of patients feeling severely affected by multiple sclerosis. Palliative and Supportive  
11 Care 2014;**13**(3):733-40 doi: 10.1017/S1478951514000510[published Online First: Epub  
12 Date]].
- 13 43. Fisseni H. *Persönlichkeitsbeurteilung. Zu Theorie und Praxis des psychologischen Gutachtens ;*  
14 *eine Einführung.* Göttingen, Toronto, Zürich: Hogrefe, Verl. für Psychologie, 1992.
- 15 44. Flick U. *Qualitative Sozialforschung. Eine Einführung.* Reinbek bei Hamburg: Rowohlt, 2007.
- 16 45. Rudinger G, Rietz C. *Methodological issues in a cross-European study.* Amsterdam: IOS, 1999.
- 17 46. Illes F, Rietz C, Rudinger G, Maier W, M. R. *Der GenEthik-Fragebogen. Ein Instrument zur*  
18 *Erfassung der Einstellung zu psychiatrisch-genetischer Untersuchung und Forschung [The*  
19 *GenEthic Questionnaire. An instrument to measure attitudes toward psychiatric-genetic*  
20 *research].* Bonn: PACE, 2003.
- 21 47. Hanks G, Cherry N, Christakis N, Fallon M, Stein Kaasa, Portenoy R. *Oxford Textbook of*  
22 *Palliative Medicine:* Oxford University Press, 2015.
- 23  
24  
25  
26  
27  
28  
29  
30  
31  
32  
33  
34  
35  
36  
37  
38  
39  
40  
41  
42  
43  
44  
45  
46  
47  
48  
49  
50  
51  
52  
53  
54  
55  
56  
57  
58  
59  
60

# BMJ Open

## Last Year of Life Study Cologne (LYOL-C): protocol for a cross-sectional mixed methods study to examine care trajectories and transitions in the last year of life until death

|                                 |                                                                                                                                                                                                                                                                                                                                                                                                                                                                                                                                                                                                                                                                                                                                            |
|---------------------------------|--------------------------------------------------------------------------------------------------------------------------------------------------------------------------------------------------------------------------------------------------------------------------------------------------------------------------------------------------------------------------------------------------------------------------------------------------------------------------------------------------------------------------------------------------------------------------------------------------------------------------------------------------------------------------------------------------------------------------------------------|
| Journal:                        | <i>BMJ Open</i>                                                                                                                                                                                                                                                                                                                                                                                                                                                                                                                                                                                                                                                                                                                            |
| Manuscript ID                   | bmjopen-2017-021211.R1                                                                                                                                                                                                                                                                                                                                                                                                                                                                                                                                                                                                                                                                                                                     |
| Article Type:                   | Protocol                                                                                                                                                                                                                                                                                                                                                                                                                                                                                                                                                                                                                                                                                                                                   |
| Date Submitted by the Author:   | 19-Mar-2018                                                                                                                                                                                                                                                                                                                                                                                                                                                                                                                                                                                                                                                                                                                                |
| Complete List of Authors:       | Strupp, Julia; Medical Faculty of the University of Cologne, Department of Palliative Medicine<br>Hanke, Gloria; Medical Faculty of the University of Cologne, Department of Palliative Medicine<br>Schippel, Nicolas; University of Cologne, Faculty of Human Sciences<br>Pfaff, Holger; University of Cologne, Cologne, Germany, Institute of Medical Sociology, Health Services Research, and Rehabilitation Science (IMVR)<br>Karbach, U.; University of Cologne, Institute of Medical Sociology, Health Services Research, and Rehabilitation Science (IMVR)<br>Rietz, Christian; University of Cologne, Faculty of Human Sciences<br>Voltz, Raymond; Medical Faculty of the University of Cologne, Department of Palliative Medicine |
| <b>Primary Subject Heading</b>: | Health services research                                                                                                                                                                                                                                                                                                                                                                                                                                                                                                                                                                                                                                                                                                                   |
| Secondary Subject Heading:      | Health services research, Palliative care                                                                                                                                                                                                                                                                                                                                                                                                                                                                                                                                                                                                                                                                                                  |
| Keywords:                       | PALLIATIVE CARE, mixed methods, end-of-life care, health services research                                                                                                                                                                                                                                                                                                                                                                                                                                                                                                                                                                                                                                                                 |
|                                 |                                                                                                                                                                                                                                                                                                                                                                                                                                                                                                                                                                                                                                                                                                                                            |

SCHOLARONE™  
Manuscripts

1  
2  
3  
4  
5  
6  
7  
8  
9  
10  
11  
12  
13  
14  
15  
16  
17  
18  
19  
20  
21  
22  
23  
24  
25

# Last Year of Life Study Cologne (LYOL-C): protocol for a cross-sectional mixed methods study to examine care trajectories and transitions in the last year of life until death

26  
27  
28  
29  
30  
31  
32  
33  
34

Strupp, Julia\*<sup>1</sup>, Hanke, Gloria\*<sup>1</sup>, Schippel, Nicolas<sup>2</sup>, Pfaff, Holger<sup>3,4</sup>, Karbach, Ute<sup>3,4</sup>, Rietz, Christian<sup>2</sup>, Voltz, Raymond<sup>1,3,5,6</sup>

on behalf of CoRe-Net

<sup>1</sup> University of Cologne, Medical Faculty, Department of Palliative Medicine, Cologne, Germany

<sup>2</sup> University of Cologne, Faculty of Human Sciences, Working Area Research Methodology Cologne, Germany

<sup>3</sup> University of Cologne, Center for Health Services Research Cologne, Germany (ZVFK)

<sup>4</sup> University of Cologne, Institute of Medical Sociology, Health Services Research, and Rehabilitation Science (IMVR), Germany

<sup>5</sup> University of Cologne, Center for Integrated Oncology Cologne / Bonn (CIO), Germany

<sup>6</sup> University of Cologne, Clinical Trials Center Cologne (ZKS), Germany

35  
36  
37  
38  
39  
40  
41  
42  
43  
44  
45

Corresponding author: Dr. Dr. Julia Strupp,

Postal address: Department of Palliative Medicine, Medical Faculty of the University of Cologne, Kerpener Str. 62, 50924 Köln

Email: [julia.strupp@uk-koeln.de](mailto:julia.strupp@uk-koeln.de)

Phone: [+49 221 478-87125](tel:+4922147887125)

46  
47  
48  
49

Words: 2762

50  
51  
52  
53  
54  
55  
56  
57  
58  
59  
60

\*both authors contributed equally to this manuscript

## Abstract

**Introduction:** The last year of life constitutes a particularly vulnerable phase for patients, involving nearly all health and social care structures. Yet, little scientific evidence is available that provides insight into the trajectories including the number and types of care setting transitions, transitions into palliative care and the dying phase. Only few studies have focused on difficulties associated with having to move between health and social care settings in the last year of life, although patients face a significant risk of adverse events. The Last Year of Life Study Cologne (LYOL-C) aims to fill this gap.

**Methods and analysis:** LYOL-C is a mixed methods study composed of four steps. i) Claims data collected by the statutory health insurance funds of deceased persons will be analyzed with regard to patient care trajectories, health service transitions and costs in the last year of life. ii) Patient trajectories and transitions in health care will additionally be reconstructed by analyzing the retrospective accounts of bereaved relatives (n=400) using a culturally adapted version of the VOICES-SF (Views of Informal Carers – Evaluation of Services Short Form) questionnaire and the PACIC-SF (Patient Assessment of Care for Chronic Conditions Short Form) questionnaire adapted for relatives. iii) Qualitative interviews with bereaved relatives (n=40-60) will provide in-depth insight into reasons for transitions and effects on patients' quality of life. iv) Focus groups (n=3-5) with Health Care Professionals will be conducted to discuss challenges associated with transitions in the last year of life.

**Ethics and dissemination:** Ethical approval has been obtained from the Ethics Commission of the Faculty of Medicine of Cologne University (#17-188). Results will be submitted for publication in peer-reviewed journals and presented at national and international conferences.

**Trial registration:** The study is registered in the German Clinical Trials Register (DRKS00011925) and in the Health Services Research Database (VfD\_CoRe-Net\_17\_003806).

Words: 300

Keywords: end-of-life care, mixed methods, palliative care, health services research, dying phase

### Strengths and limitations of the study

- LYOL-C will be the first study in Germany to examine health and social care trajectories and transitions of patients in their last year of life until death (independent of patient age, underlying diagnoses or care settings) within an entire region that possesses optimal palliative and hospice care structures.
- Our survey sample will be recruited through multiple channels and with a comparatively large sample size (n=400) for palliative settings to ensure variety in care trajectories and places of death.
- The mixed methods design enables a multidimensional view to reconstruct the last year of life including the reports of bereaved relatives as well as health care professionals.
- Claims data can be validated externally with our survey data and vice versa while the interviews and focus groups enable a clarification of claims data and survey results with a multi-stakeholder perspective.
- The perspective of relatives can't be seen as a direct substitute for a self-assessment of patients, although moderate agreement between patient and proxy ratings develops over time.

## BACKGROUND

About 1% of the German population dies each year (e.g., in the year 2015, 925 200 deaths out of a total population of 81.6 million)[1]. For each patient who passes away, there are approx. three to four relatives who go through a subsequent bereavement period. This means that 5% of our population is affected by death each year, with the relative and absolute numbers increasing with changes in demography. In the year 2013, 46% of patients in Germany died in hospitals, with mortality rates increasing with age: 55% dying in hospitals were aged 65 and above. In North-Rhine-Westphalia, 49% died in hospitals, yet most people prefer to die at home, and hospitals have been perceived as giving only little support to patients' needs at the end of life. Furthermore, home care is cost-effective when shifting the care of the dying patients from hospital to home [2-4]. This is even more important as about one-third of the total health expenditure in a life span occurs during the last months of life [5 6] and there have been increases in both aggressive and non-aggressive care at the end of life with increasing multiple hospitalizations [7]. Furthermore, recent studies report of worsening symptom prevalence in the last year of life and raise concerns about shortcomings in end-of-life care and that there remain persistent gaps in addressing symptoms near the end of life[8 9] .

The last year of life therefore constitutes a particularly vulnerable phase in life for patients, involving nearly all health and social care structures. Yet, so far, only very little scientific evidence is available that provides insight into the trajectories including the number and types of care setting transitions. Only few studies have focused on difficulties associated with having to move between health and social care settings in the last year of life, such as the burden to caregivers and cost of hospital transfers [10 11], although patients face a significant risk of adverse events, for instance during the transition from hospital to home [12]. The Last Year of Life Study Cologne (LYOL-C) aims to fill this gap by being the first study in Germany to examine patient trajectories (independent of age, underlying diagnoses or care settings) and transitions between care settings and experiences in the last year of life including palliative care integration and the dying phase within a specific region (Cologne). Trajectories are defined as "(...) a course of illness over time plus the actions taken by patients, families and health professionals to manage or shape the course"[13]. Gill et al.[14] have found that the illness leading to death does not predict a patient's trajectory. Therefore it is necessary to identify typical trajectories in the last year of life and to thereby provide time frames and patterns of probable needs and support from health and social services for patients (and carers)[15]. A transition "(...) occurs between two locations or settings of care, for example moving from hospital to a care home. It may also represent a shift in the nature of care, such as the decision not to continue with curative treatments"[16]. Regarding LYOL-C, we therefore concentrate (a) on transitions within the disease trajectory, i.e. from a

1  
2  
3 curative to a palliative approach as well as the dying phase and (b) transitions between  
4 health care structures, e.g., hospital to home, nursing home to hospital. It is important to  
5 study the patients' and professionals' point of view on (i) which transitions take place, (ii)  
6 what are the reasons and determinants for these transitions (e.g., DRG-related factors), (iii)  
7 what are the effects on patient quality of life, (iv) whether how and when a palliative care  
8 approach was introduced and finally, (v) where and how patients die. Cologne, with its one  
9 million inhabitants, is representative of the German urban setting and already possesses  
10 optimal palliative and hospice care structures [17]. The LYOL-C study is the first step in  
11 developing a stable regional End of Life Care Network, similar to the National End of Life  
12 Network in the UK [18], which will bring together all stakeholders caring for people at the end  
13 of life. This network will also serve as the basis for immediate and future patient-centered  
14 and value-based changes derived from the initial descriptive and hypothesis-generating data  
15 obtained within the Cologne Research and Development Network (CoRe-Net). LYOL-C,  
16 being one of the CoRe-Net subprojects, aims to improve the management of patients in their  
17 last year of life including the dying phase.

18  
19 Patient preferences and values must be integrated more into the development of health care  
20 structures [19]. This is especially relevant for and apparent in the last year of life, which is a  
21 major contributor to overall health care costs [5]. Palliative Care encompasses central  
22 elements associated with patient-centered and value-based care, including physical comfort  
23 and emotional support, dignity and respect during the dying process, shared decision  
24 making, identifying and meeting the patient's needs and values, and coordinating care [20  
25 21]. A recent study showed that community-based specialist palliative care was associated  
26 with hospital cost reductions across multiple life-limiting conditions [22]. Internationally it has  
27 been reported that despite the growing use of palliative and hospice care structures, there  
28 has been an increase in the number of transitions in the last year of life [16 23]. The primary  
29 contributors to this are structural factors (e.g., financial, legal) and a lack of emphasis on  
30 increasing value for patients and relatives [24]. The Patient-Centered Outcomes Research  
31 Institute has found that poorly executed transitions between health care settings can harm  
32 patients and lead to additional hospital visits [25] which can be burdensome and decrease  
33 quality of life [23 26]. In the US, hospital readmission follows 12-25% of hospital discharges  
34 in the last year of life, with almost 50% of readmissions going through an emergency room  
35 [27]. The fact that caregivers are often emotionally and physically burdened with providing  
36 home care is one factor leading to admission into inpatient care settings, despite the fact that  
37 relatives' and patients' preferences for home care have not changed. A recent study has  
38 found that a greater understanding of family caregivers' preferences is needed to identify  
39 how best to support families at the end of life and to ensure more patients are cared for in a  
40 value-based way [28].

1  
2  
3 For Germany, scientific evidence on the benefits of Palliative Care has emerged in recent  
4 years, currently mainly on specific aspects of care structures (e.g., discharge after stay in a  
5 palliative care unit) [29-31] or restricted to clinical questions, e.g., pain or breathlessness [32-  
6 34]. A general health services research approach incorporating all regional care structures is  
7 still missing. The city of Cologne, which is home to Germany's first palliative care unit  
8 founded at the University Hospital of Cologne in 1983, currently offers an area-wide palliative  
9 and hospice care setting including all care structures currently offered by the German  
10 system. Cologne even has a three-level palliative care structure – general (general  
11 practitioners [GPs], nursing), intermediate (qualified palliative care physicians and palliative  
12 care nursing [QPA]) and specialized palliative outpatient care (SAPV) – which is unique to  
13 the North-Rhine area. The city, therefore, provides the optimal urban setting for studying  
14 future health service developments in end-of-life care in Germany.

15  
16  
17  
18  
19  
20  
21  
22 LYOL-C therefore aims to

- 23 I. examine care trajectories and transitions in the last year of life until death in Cologne,
- 24 II. improve the management of patients in their last year of life including the dying phase  
25 by consented immediate action in a patient-centered and value-based way,
- 26  
27 III. derive further care innovations based on initial descriptive and hypothesis-generating  
28 data that could be evaluated in future studies.

29  
30  
31  
32 The study period will be from February 2017 to January 2020.

## 33 34 35 **METHODS AND ANALYSIS**

36  
37  
38 LYOL-C is a mixed methods study and consists of four phases:

### 39 **Phase I: Claims Data Analysis on the patient epidemiology of the last year of life**

40  
41 Several statutory health insurance funds (SHI) will provide anonymised claims data, covering  
42 together ~55% of the Cologne population. With regard to Cologne, about 800.000 people are  
43 insured with the SHI. Taking into account that 1% of them die each year (~8.000) [35], we  
44 are able to analyze patient trajectories of all deceased insureds of the participating SHI  
45 funds. Counting backward from date of death, the last year of life can be assessed for those  
46 continuously insured until death using data from the respective SHI fund. In a first step,  
47 deceased patients are characterized according to age, sex, medication (e.g., polypharmacy),  
48 morbidity (e.g., Charlson and Elixhauser comorbidity measures assessed by ICD 10 codes),  
49 utilization of long term nursing care (level and place of care) and other health problems  
50 highly prevalent in patients at the end of life (e.g., oral health issues). In addition, direct  
51 medical costs will be estimated for the last year of life according to sectors of care. Master

1  
2  
3 data (e.g., insurance time, pseudonymized unique patient identifier) will be used for defining  
4 the study population, while master data (sex, age, nursing care) and information from all  
5 sectors of care will be used for describing the population and analyzing influencing factors on  
6 the outcome variables (e.g. number of transitions, place of death) using multiple regression  
7 analysis. Trajectories between sectors of care can be analyzed with the help of the  
8 pseudonymized patient identifiers. Emergency visits and hospital referrals according to  
9 doctor's specialty will be assessed. Analysis will be performed for all patients who died  
10 (excluding accidents and homicides). Analysis will provide a status quo of main care  
11 trajectories to be analyzed in the following steps.

12  
13 **Inclusion criteria:** Deceased person who lived in Cologne and died aged 18 years or older.  
14 We relate to deaths that have occurred in the last 12 months prior to the survey (November  
15 2016 to April 2018).

## 16 17 18 19 20 21 22 **Phase II: Quantitative survey with bereaved informal caregivers to analyze patient** 23 **trajectories in the last year of life**

24  
25 Patient trajectories and transitions in health care will be reconstructed by analyzing the  
26 retrospective accounts of bereaved relatives (n=400). A questionnaire will be used, covering  
27 e.g., the number and types of transitions between care settings, use of palliative care  
28 services and (best) timing of admission to palliative care services. Data will also be collected  
29 using the validated Views of Informal Carers – Evaluation of Services Short Form (VOICES-  
30 SF) questionnaire. VOICES is a postal questionnaire about experiences of end of life care in  
31 the last months of life, focusing on quality of care and services received. Using the post-  
32 bereavement method it gathers information from bereaved relatives, friends or carers acting  
33 as proxies [36]. Within our study, we will adapt the questions of VOICES-SF to the German  
34 health care system and translate them into German. Procedures for translation and  
35 assessment are based on the team translation approach described by Harkness ("TRAPD")  
36 [37] which is also applied in cross-national social surveys (e.g. European Social Survey [38],  
37 Programme for the International Assessment of Adult Competencies [39]). To analyze  
38 patient-centeredness, the Patient Assessment of Care for Chronic Conditions Short Form  
39 (PACIC-SF) [40-42] will be applied. The PACIC-SF adapted for relatives will be validated in  
40 the course of our project. The instrument measures the extent to which patients receive care  
41 that is patient-centered, proactive, planned and includes collaborative goal setting, problem-  
42 solving and follow-up support. It is a validated patient self-report instrument and will be  
43 adapted for usage with bereaved relatives. Participants will be recruited mainly via our field  
44 access partners, e.g. hospices, care facilities, nursing homes, specialized outpatient  
45 palliative care services, palliative care units, ecclesiastical institutions, community centers,  
46 funeral homes. Recruitment will also be done via newspaper advertisements, GPs, local GP  
47  
48  
49  
50  
51  
52  
53  
54  
55  
56  
57  
58  
59  
60

1  
2  
3 networks (snowballing technique) and local bereavement groups run by palliative hospice  
4 structures. We expect recruitment to go smoothly, as recruitment also went rapidly in  
5 previous research projects, such as on living wills and multiple sclerosis [43 44].

6  
7 The survey design allows comparisons to be made between the quality of care given to  
8 people dying at different ages (for example less than 65 years, 65-79 years or 80 years or  
9 more) and different causes of death (cardiovascular, cancer or other) and for people  
10 receiving care in different settings during the last months of life (for example home, hospital,  
11 care home and/or hospice). Analysis is undertaken in various statistical packages using  
12 weights and the sampling stratification. The VOICES survey e.g. calculates a weight for each  
13 response to the survey, to account for biases within the sample design, adjust for non-  
14 response bias and calibrate weights to the population of the sampling frame. These weights  
15 are used to calculate weighted percentages. Data will be analyzed using SPSS Statistics 24.

16  
17 **Inclusion Criteria:** Relatives, friends, carers and volunteers can be included if i) they are 18  
18 years or older, ii) they have cared for a deceased person in his/her last year of life, iii) the  
19 deceased person was 18 years or older, iv) his/her death has occurred in the last 12 months.

20  
21 **Exclusion Criteria:** Accidental death and killing.

### 22 23 24 25 26 27 **Phase III: In-depth interviews with bereaved informal caregivers to gain insight into** 28 **patient trajectories**

29  
30 Qualitative interviews (n=40 to 60, by means of purposeful sampling to secure maximum  
31 heterogeneity) with bereaved relatives will provide in-depth insight into the reasons for  
32 transitions and the effects on the quality of life of the patients, including in the dying phase.  
33 Relatives will be recruited based on the type of care trajectory, the five most frequent types  
34 of trajectories (as reconstructed from the claims data analysis and questionnaire survey), site  
35 of death, underlying diagnoses, living situation, age and sex of the deceased. Interviews will  
36 follow a topic guide to ensure consistency across interviews. Interviews will be conducted  
37 during the first 12 months after death to ensure that relatives' memories are sufficiently fresh  
38 for them to provide details about their experiences. They can decide by themselves about the  
39 best timing for them to participate in the interview and feel able to speak about their  
40 experiences without becoming too upset. All interviews will be recorded, transcribed verbatim  
41 and anonymized.

42  
43 Krueger & Casey (2000) advocate the use of a computer-based approach for cutting,  
44 pasting, sorting, arranging and rearranging data through comparing and contrasting the  
45 relevant information. For this purpose we will use MAXQDA, professional software for  
46 qualitative data analysis, as already mentioned for analyzing patient trajectories via  
47 qualitative interviews. Data will be analyzed according to Fisseni [45] and applying qualitative  
48 content analysis according to Flick [46] which has already been successfully performed in  
49 some of our own studies [47 48].

1  
2  
3 **Inclusion criteria:** see phase II

4 **Exclusion criteria:** see phase II  
5  
6

7 **Phase IV: Focus Groups with Health Care Professionals (HCPs) to analyze views on**  
8 **transitions**  
9

10 Focus groups (n=3-5) with HCPs will be conducted to discuss challenges associated with  
11 transitions in the last year of life and identify key issues and possibilities for improvements in  
12 the organization. Following analysis of the data extracted in phases I to III, focus groups will  
13 be conducted with key health and social care providers involved in the care of people in the  
14 last year of life within hospital and outpatient settings, nursing homes, hospices, etc. The aim  
15 is to explore current practice in health and social care management and the way that  
16 transitions to a palliative care approach and transitions between structures are managed in  
17 different settings and how the care organizations are able to assess patient needs,  
18 preferences and health literacy. This phase will be conducted with support from our field  
19 access partners. Purposive sampling will be used to select a diverse range of HCPs and  
20 achieve the maximum possible variation of experience and opinion. Data will be analyzed  
21 according to Fisseni [45] and applying qualitative content analysis according to Flick [46].  
22  
23  
24  
25  
26  
27

28 **Inclusion criteria:** HCPs involved in the care of people in the last year of life in Cologne.  
29  
30

31 **Patient and Public Involvement (PPI)**

32 PPI has been embedded in the study from conception, one PPI contributor for instance was  
33 a cooperation partner and bereaved relative. We had support in the development of the  
34 research design from several collaboration partners to discuss the relevance of the study and  
35 that it will be participant friendly and ethically sound.  
36  
37

38 To enhance PPI even further, a meeting with field access partner was conducted to inform  
39 each phase of the study design. Furthermore, a network meeting took place with more than  
40 70 participants. This meeting intended to inform about CoRe-Net and create the future of the  
41 Cologne Research and Development Network together. The meeting was attended by  
42 patient and relative representatives, representatives from health insurances and the medical  
43 chamber, science and medical professions, besides many others involved in health and  
44 social care in Cologne. Each meeting was constructed around various phases of the  
45 research project. The face-to-face meetings included presentations by the research team  
46 about the study and its progress.  
47  
48  
49  
50

51 With regard to disseminating results to study participants, the results and deliverables will be  
52 disseminated within the region of Cologne via the Cologne lab conferences and CoRe-Net-  
53 Public Relations. Through the networks and projects in which the members of CoRe-Net are  
54 key stakeholders, national and international dissemination of experience can be assured. For  
55  
56  
57  
58  
59  
60

1  
2  
3 LYOL-C, dissemination will be done via e.g., the National Society for Palliative Care, the  
4 National Palliative Care Strategy, the European Association for Palliative Care, the European  
5 Academy of Palliative Care, and the UK End-of-Life Network with our collaboration partner  
6 Prof. Dr. Sheila Payne.  
7  
8  
9

## 10 **ETHICS AND DISSEMINATION**

11 People who are approaching the end of life are particularly vulnerable. We will therefore  
12 analyze the views of bereaved relatives as well as health professionals and analyze claims  
13 data to describe patients' trajectories. The Oxford Textbook of Palliative Medicine [49] sets  
14 out five ethical aspects that should be considered when undertaking palliative care research:  
15 the study's potential benefits to future patients, the study's potential benefits to subjects, the  
16 study's risk to subjects, subjects' decision-making capacity, and the voluntariness of  
17 subjects' choices about research participation. All these aspects will be addressed within our  
18 project and all respondents will only participate with an informed consent. Ethical approval for  
19 this study was obtained from the Ethics Commission of the Faculty of Medicine of Cologne  
20 University (#17-188).  
21  
22

23 Restructuring complex care for vulnerable patients at the end of life is highly needed in  
24 Germany because these patients often are lost in transition between multi-professional and  
25 multi-institutional care providers. This generates unnecessary costs, ill-health and thus low  
26 value for patient and their relatives and caregivers. The results of our study will be  
27 disseminated within the region of Cologne via the Cologne lab conferences and CoRe-Net  
28 public relations. To further implement regional changes, CoRe-Net will be immediately  
29 "available" as a "Cologne lab" with collaboration partners, a large database and standardized  
30 pathways derived from the projects. Possible changes that can be directly implemented after  
31 the first funding phase (years 1-3) of LYOL-C are, e.g., "round tables" for health  
32 professionals treating patients in their last year of life in order to discuss sign-posts for  
33 transitions.  
34  
35

36 Results of all four phases will be submitted for publication in peer-reviewed journals and  
37 presented at national and international conferences.  
38  
39  
40  
41  
42

## 43 **List of Abbreviations**

44 CoRe-Net – Cologne Research and Development Network

45 GP – General Practitioner

46 HCPs – Health Care Professionals

47 LYOL-C – Last Year of Life Study Cologne

48 PACIC-SF - Patient Assessment of Care for Chronic Conditions Short Form

49 QPA - qualified palliative care physicians  
50  
51  
52  
53  
54  
55  
56  
57  
58  
59  
60

1  
2  
3 SAPV - specialized palliative outpatient care

4 SHI – Statutory Health Insurance Funds

5  
6 VOICES-SF - Views of Informal Carers – Evaluation of Services Short Form

7  
8  
9 **Declarations**

10 • Authors' contributions

11 JS is Principal Investigator and responsible for the study design and project management

12 GH is responsible for the operative management of LYOL-C, the recruitment, data collection,  
13 data analysis, dissemination

14 NS is responsible for the recruitment, data collection, data analysis, dissemination

15 HP and UK are principal investigators of CoRe-net and responsible for methodological  
16 consulting

17 CR is Principal Investigator and responsible for the study design and project management

18 RV is Principal Investigator and responsible for the study design and project management

19 All authors read an approved the final manuscript.

20  
21  
22 • Funding

23 This work was supported by the German Federal Ministry of Education and Research  
24 (BMBF), grant number #01GY1606

25 • Ethics approval and consent to participate

26 Ethical approval for this study was obtained from the Ethics Commission of the Faculty of  
27 Medicine of Cologne University (#17-188).

28  
29 • Consent of publication

30 Not applicable.

31 • Availability of data and material

32 The datasets generated and/or analyzed during the current study are available from the  
33 corresponding author on reasonable request.

34 • Competing interests

35 The authors declare that they have no competing interests.

36 • Acknowledgements

37 The authors would like to thank the BMBF for funding this study (#01GY1606) as well as our  
38 field access partner for their support. We would also like to acknowledge the support from  
39 our CoRe-Net Co-applicants: Prof. Dr. Christian Albus, Department of Psychosomatics and  
40 Psychotherapy, Faculty of Medicine (FM), University Hospital Cologne (UHC), Jun-Prof. Dr.  
41 Lena Ansmann, Institute of Medical Sociology, Health Services Research and Rehabilitation  
42 Science (IMVR), Faculty of Human Sciences (FHS), University of Cologne (UoC), Prof. Dr.  
43 Frank Jessen, Department of Psychiatry and Psychotherapy, FM, UHC, Dr. Ute Karbach,  
44 IMVR, Center for Health Services Research Cologne (ZVFK), FM, FHS, UoC, Prof. Dr.

1  
2  
3 Ludwig Kuntz, Department of Business Administration and Health Care Management,  
4 Faculty of Management, Economics and Social Sciences (FMESS), UoC, Dr. Ingrid  
5 Schubert, PMV Health Care Research Group, FM, UoC, Prof. Dr. Frank Schulz-Nieswandt,  
6 Institute for Sociology and Social Psychology, FMESS, UoC, Prof. Dr. Stephanie Stock,  
7 Institute for Health Economics and Clinical Epidemiology, FM, UHC. We would also like to  
8 thank Dieter Jänsch for his support as a patient adviser and relative for his enormous  
9 support.  
10  
11  
12  
13  
14  
15  
16  
17  
18  
19  
20  
21  
22  
23  
24  
25  
26  
27  
28  
29  
30  
31  
32  
33  
34  
35  
36  
37  
38  
39  
40  
41  
42  
43  
44  
45  
46  
47  
48  
49  
50  
51  
52  
53  
54  
55  
56  
57  
58  
59  
60

For peer review only

## References

1. Statistisches Bundesamt. *Gesundheit: Todesursachen in Deutschland [Causes of Death in Germany]*. Wiesbaden: Statistisches Bundesamt, 2015.
2. Pham B, Krahn M. End-of-Life Care Interventions: An Economic Analysis. *Ont Health Technol Assess Ser* 2014;**14**(18):1-70
3. Gomes B, Calanzani N, Higginson IJ. Benefits and costs of home palliative care compared with usual care for patients with advanced illness and their family caregivers. *JAMA* 2014;**311**(10):1060-1 doi: 10.1001/jama.2014.553[published Online First: Epub Date]].
4. Smith S, Brick A, O'Hara S, Normand C. Evidence on the cost and cost-effectiveness of palliative care: a literature review. *Palliat Med* 2014;**28**(2):130-50 doi: 10.1177/0269216313493466[published Online First: Epub Date]].
5. Hogan C, Lunney J, Gabel J, Lynn J. Medicare Beneficiaries' Costs Of Care In The Last Year Of Life. *Health Affairs* 2001;**20**:188–95 doi: 10.1377/hlthaff.20.4.188[published Online First: Epub Date]].
6. Lubitz JD, Riley GF. Trends in Medicare Payments in the Last Year of Life. *New England Journal of Medicine* 1993;**328**(15):1092-96 doi: 10.1056/nejm199304153281506[published Online First: Epub Date]].
7. Riley GF, Lubitz JD. Long-Term Trends in Medicare Payments in the Last Year of Life. *Health Services Research* 2010;**45**(2):565-76 doi: 10.1111/j.1475-6773.2010.01082.x[published Online First: Epub Date]].
8. Singer AE, Meeker D, Teno JM, Lynn J, Lunney JR, Lorenz KA. Symptom trends in the last year of life from 1998 to 2010: a cohort study. *Ann Intern Med* 2015;**162**(3):175-83 doi: 10.7326/M13-1609[published Online First: Epub Date]].
9. Walling AM, Asch SM, Lorenz KA, et al. The quality of care provided to hospitalized patients at the end of life. *Arch Intern Med* 2010;**170**(12):1057-63 doi: 10.1001/archinternmed.2010.175[published Online First: Epub Date]].
10. Halasyamani L, Kripalani S, Coleman E, et al. Transition of Care for Hospitalized Elderly. *Hosp. Med* 2006;**6**:354-60 doi: 10.1002/jhm.129[published Online First: Epub Date]].
11. Ma E, Coleman EA, Fish R, Lin M, Kramer AM. Quantifying Posthospital Care Transitions in Older Patients. *Journal of the American Medical Directors Association* 2004;**5**(2):71-74 doi: [http://dx.doi.org/10.1016/S1525-8610\(04\)70058-4](http://dx.doi.org/10.1016/S1525-8610(04)70058-4)[published Online First: Epub Date]].
12. Forster AJ, Murff HJ, Peterson JF, Gandhi TK, Bates DW. The incidence and severity of adverse events affecting patients after discharge from the hospital. *Annals of Internal Medicine* 2003;**138**(3):161-67 doi: 10.7326/0003-4819-138-3-200302040-00007[published Online First: Epub Date]].
13. Corbin JM. The Corbin and Strauss Chronic Illness Trajectory model: an update. *Scholarly Inquiry for Nursing Practice* 1998;**12**(1):33-41
14. Gill TM, Gahbauer EA, Han L, Allore HG. Trajectories of Disability in the Last Year of Life. *The New England journal of medicine* 2010;**362**(13):1173-80 doi: 10.1056/NEJMoa0909087[published Online First: Epub Date]].
15. Murray SA, Kendall M, Boyd K, Sheikh A. Illness trajectories and palliative care. *BMJ : British Medical Journal* 2005;**330**(7498):1007-11
16. Hanratty B, Lowson E, Grande G, et al. Transitions at the end of life for older adults – patient, carer and professional perspectives: a mixed-methods study. *Health Services and Delivery Research* 2014;**2**:1-102
17. Erdogan-Griese B. Palliativmedizin im Rheinland: Ein starkes Netz für das Leben. *Rheinisches Ärzteblatt* 2012:12-13
18. National End of Life Care Intelligence Network. *What do we know now that we didn't know a year ago? New intelligence on end of life care in England*, 2012.
19. Porter ME, Pabo EA, Lee TH. Redesigning Primary Care: A Strategic Vision To Improve Value By Organizing Around Patients' Needs. *Health Affairs* 2013;**32**(3):516-25 doi: 10.1377/hlthaff.2012.0961[published Online First: Epub Date]].
20. Singer PA, Martin DK, Kelner M. Quality end-of-life care: Patients' perspectives. *JAMA* 1999;**281**(2):163-68 doi: 10.1001/jama.281.2.163[published Online First: Epub Date]].
21. Teno JM, Casey VA, Welch LC, Edgman-Levitan S. Patient-Focused, Family-Centered End-of-Life Medical Care. *Journal of Pain and Symptom Management* 2001;**22**(3):738-51 doi: [http://dx.doi.org/10.1016/S0885-3924\(01\)00335-9](http://dx.doi.org/10.1016/S0885-3924(01)00335-9)[published Online First: Epub Date]].
22. Spilsbury K, Rosenwax L. Community-based specialist palliative care is associated with reduced hospital costs for people with non-cancer conditions during the last year of life. *BMC Palliat Care* 2017;**16**(1):68 doi: 10.1186/s12904-017-0256-2[published Online First: Epub Date]].

23. Gozalo P, Teno JM, Mitchell SL, et al. End-of-Life Transitions among Nursing Home Residents with Cognitive Issues. *New England Journal of Medicine* 2011;**365**(13):1212-21 doi: 10.1056/NEJMsa1100347[published Online First: Epub Date].
24. Weber M, Claus M, Zepf KI, Fischbeck S, Escobar Pinzon LC. Dying in Germany—Unfulfilled Needs of Relatives in Different Care Settings. *Journal of Pain and Symptom Management* 2012;**44**(4):542-51 doi: <http://dx.doi.org/10.1016/j.jpainsymman.2011.10.024>[published Online First: Epub Date].
25. Patient-Centered Outcomes Research Institute (pcori). In care transitions, a chance to make or break patients' recovery. Secondary In care transitions, a chance to make or break patients' recovery 2015. <http://www.pcori.org/research-in-action/care-transitions-chance-make-or-break-patients-recovery>.
26. Smeenk FWJM, de Witte LP, van Haastregt JCM, Schipper RM, Biezemans HPH, Crebolder HFJM. Transmural care. *Patient Education and Counseling* 1998;**35**(3):189-99 doi: [http://dx.doi.org/10.1016/S0738-3991\(98\)00062-7](http://dx.doi.org/10.1016/S0738-3991(98)00062-7)[published Online First: Epub Date].
27. Coleman EA, Min S-j, Chomiak A, Kramer AM. Posthospital Care Transitions: Patterns, Complications, and Risk Identification. *Health Services Research* 2004;**39**(5):1449-66 doi: 10.1111/j.1475-6773.2004.00298.x[published Online First: Epub Date].
28. Woodman C, Baillie J, Sivell S. The preferences and perspectives of family caregivers towards place of care for their relatives at the end-of-life. A systematic review and thematic synthesis of the qualitative evidence. *BMJ Supportive & Palliative Care* 2016;**6**(4):418-29 doi: 10.1136/bmjspcare-2014-000794[published Online First: Epub Date].
29. Jors K, Adami S, Xander C, et al. Dying in cancer centers: Do the circumstances allow for a dignified death? *Cancer* 2014;**120**(20):3254-60 doi: 10.1002/cncr.28702[published Online First: Epub Date].
30. Kötzsch F, Stiel S, Heckel M, Ostgathe C, Klein C. Care trajectories and survival after discharge from specialized inpatient palliative care—results from an observational follow-up study. *Supportive Care in Cancer* 2015;**23**(3):627-34 doi: 10.1007/s00520-014-2393-y[published Online First: Epub Date].
31. Pinzón LCE, Claus M, Zepf KI, Fischbeck S, Weber M. Symptom Prevalence in the Last days of Life in Germany. *American Journal of Hospice and Palliative Mediciner* 2011;**29**(6):431-37 doi: 10.1177/1049909111425228[published Online First: Epub Date].
32. Simon ST, Weingärtner V, Higginson IJ, Voltz R, Bausewein C. Definition, Categorization, and Terminology of Episodic Breathlessness: Consensus by an International Delphi Survey. *Journal of Pain and Symptom Management* 2014;**47**(5):828-38 doi: <http://dx.doi.org/10.1016/j.jpainsymman.2013.06.013>[published Online First: Epub Date].
33. Simon ST, Weingärtner V, Voltz R, Higginson IJ, Bausewein C. Episodic Breathlessness: A Clinically Relevant and Rising Issue. *Annals of the American Thoracic Society* 2014;**11**(2):274-74 doi: 10.1513/AnnalsATS.201311-407LE[published Online First: Epub Date].
34. Weingaertner V, Scheve C, Gerdes V, et al. Breathlessness, Functional Status, Distress, and Palliative Care Needs Over Time in Patients With Advanced Chronic Obstructive Pulmonary Disease or Lung Cancer: A Cohort Study. *Journal of Pain and Symptom Management* 2014;**48**(4):569-81.e1 doi: <http://dx.doi.org/10.1016/j.jpainsymman.2013.11.011>[published Online First: Epub Date].
35. Statistisches Bundesamt. *Bevölkerung und Erwerbstätigkeit. Zusammenfassende Übersichten Eheschließungen, Geborene und Gestorbene: 1946 - 2015*. Wiesbaden: Statistisches Bundesamt, 2016.
36. Hunt K, Addington-Hall JM. A Toolkit for the Design and Planning of Locally-led VOICES Surveys. *Secondary A Toolkit for the Design and Planning of Locally-led VOICES Surveys* 2011.
37. Harkness J. Questionnaire Translation. In: Harkness J, van de Vijver FJR, Mohler PPh, eds. *Cross-Cultural Survey Methods*. New York: Wiley, 2003:35-56.
38. European Social Survey. ESS Round 8 Translation Guidelines. *Secondary ESS Round 8 Translation Guidelines* 2016. [http://www.europeansocialsurvey.org/docs/round8/methods/ESS8\\_translation\\_guidelines.pdf](http://www.europeansocialsurvey.org/docs/round8/methods/ESS8_translation_guidelines.pdf).
39. Ferrari A, Wayrynen L, Behr D, Zabal A. Translation, Adaptation, and Verification of Test and Survey Materials. In: (Ed.) O, ed. *Technical Report of the Survey of Adult Skills (PIAAC)* Paris: Chapter 4, pp. 1-28, 2013.
40. Gensichen J, Serras A, Paulitsch MA, et al. The Patient Assessment of Chronic Illness Care Questionnaire: Evaluation in Patients with Mental Disorders in Primary Care. *Community Mental Health Journal* 2011;**47**(4):447-53 doi: 10.1007/s10597-010-9340-2[published Online First: Epub Date].

- 1
  - 2
  - 3
  - 4
  - 5
  - 6
  - 7
  - 8
  - 9
  - 10
  - 11
  - 12
  - 13
  - 14
  - 15
  - 16
  - 17
  - 18
  - 19
  - 20
  - 21
  - 22
  - 23
  - 24
  - 25
  - 26
  - 27
  - 28
  - 29
  - 30
  - 31
  - 32
  - 33
  - 34
  - 35
  - 36
  - 37
  - 38
  - 39
  - 40
  - 41
  - 42
  - 43
  - 44
  - 45
  - 46
  - 47
  - 48
  - 49
  - 50
  - 51
  - 52
  - 53
  - 54
  - 55
  - 56
  - 57
  - 58
  - 59
  - 60
41. Goetz K, Freund T, Gensichen J, Miksch A, Szecsenyi J, Steinhäuser J. Adaptation and Psychometric Properties of the PACIC Short Form. *Am J Manag Care* 2012;**18**(2):e55-e60
42. Rosemann T, Laux G, Droesemeyer S, Gensichen J, Szecsenyi J. Evaluation of a culturally adapted German version of the Patient Assessment of Chronic Illness Care (PACIC 5A) questionnaire in a sample of osteoarthritis patients. *Journal of Evaluation in Clinical Practice* 2007;**13**(5):806-13 doi: 10.1111/j.1365-2753.2007.00786.x[published Online First: Epub Date]].
43. Golla H, Galushko M, Pfaff H, Voltz R. Multiple sclerosis and palliative care - perceptions of severely affected multiple sclerosis patients and their health professionals: a qualitative study. *BMC Palliative Care* 2014;**13**:11-11 doi: 10.1186/1472-684X-13-11[published Online First: Epub Date]].
44. Strupp J, Golla H, Galushko M, et al. Self-rating makes the difference: Identifying palliative care needs of patients feeling severely affected by multiple sclerosis. *Palliative and Supportive Care* 2014;**13**(3):733-40 doi: 10.1017/S1478951514000510[published Online First: Epub Date]].
45. Fisseni H. *Persönlichkeitsbeurteilung. Zu Theorie und Praxis des psychologischen Gutachtens ; eine Einführung [Personality assessment. An introduction to theory and practice of psychological reports]* Göttingen, Toronto, Zürich: Hogrefe, Verl. für Psychologie, 1992.
46. Flick U. *Qualitative Sozialforschung. Eine Einführung.* Reinbek bei Hamburg: Rowohlt, 2007.
47. Rudinger G, Rietz C. *Methodological issues in a cross-European study.* Amsterdam: IOS, 1999.
48. Illes F, Rietz C, Rudinger G, Maier W, M. R. *Der GenEthik-Fragebogen. Ein Instrument zur Erfassung der Einstellung zu psychiatrisch-genetischer Untersuchung und Forschung [The GenEthic Questionnaire. An instrument to measure attitudes toward psychiatric-genetic research].* Bonn: PACE, 2003.
49. Hanks G, Cherny N, Christakis N, Fallon M, Stein Kaasa, Portenoy R. *Oxford Textbook of Palliative Medicine:* Oxford University Press, 2015.
